# Supplementary material for: SERS active Ag–SiO2 nanoparticles obtained by laser ablation of silver in colloidal silica
Source: publisher site journal article supplement (doi:10.3762/bjnano.9.224), 2018-09-06
Supplement: Additional file 1 [file 2190-4286-9-224-S1.pdf]

## **Supporting Information**

**for**

### **SERS active Ag-SiO<sub>2</sub> nanoparticles obtained by laser ablation of silver in colloidal silica**

Cristina Gellini<sup>\*1</sup>, Francesco Muniz-Miranda<sup>2,3</sup>, Alfonso Pedone<sup>2</sup> and Maurizio Muniz-Miranda<sup>1</sup>

Address: <sup>1</sup>Department of Chemistry “Ugo Schiff”, University of Florence, Via della Lastruccia 3, 50019 Sesto Fiorentino, Italy, <sup>2</sup>Department of Chemical and Geological Sciences, University of Modena and Reggio Emilia, Via Campi 103, 41125 Modena, Italy and <sup>3</sup>Center for Molecular Modeling, Ghent University, Technologiepark 903, 9052 Zwijnaarde, Belgium

Email: Cristina Gellini - [cristina.gellini@unifi.it](mailto:cristina.gellini@unifi.it)

\*Corresponding author

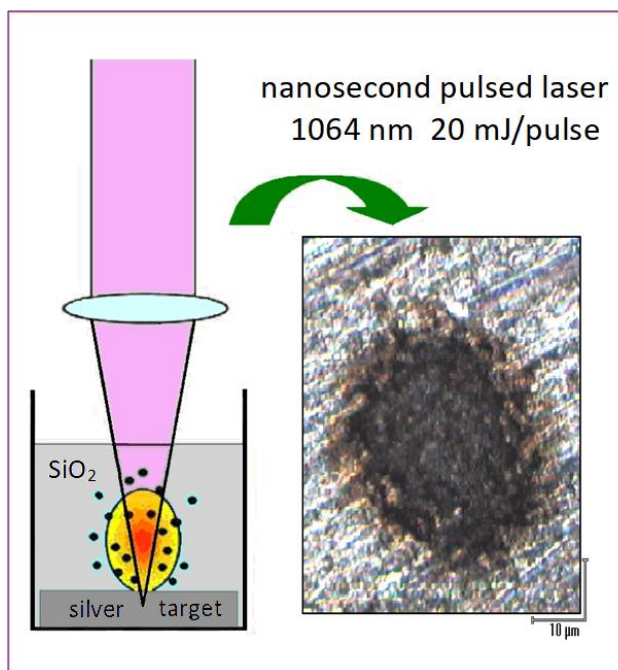

**Figure S1:** Scheme of the laser ablation procedure of a silver target in colloidal silica.

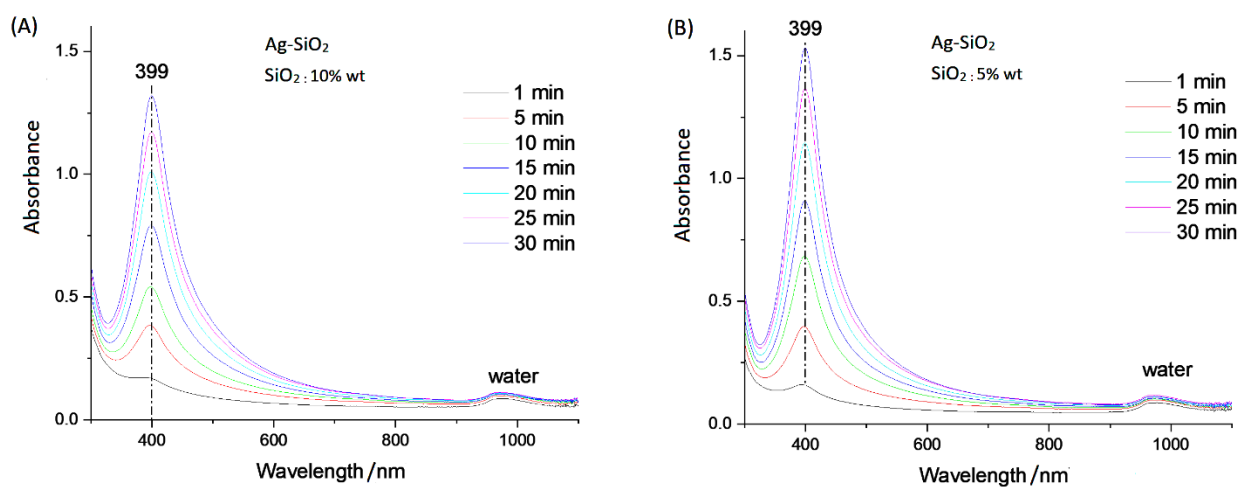

**Figure S2:** Time evolution of the plasmonic band of Ag-SiO<sub>2</sub> colloids with different silica content during laser ablation procedure.

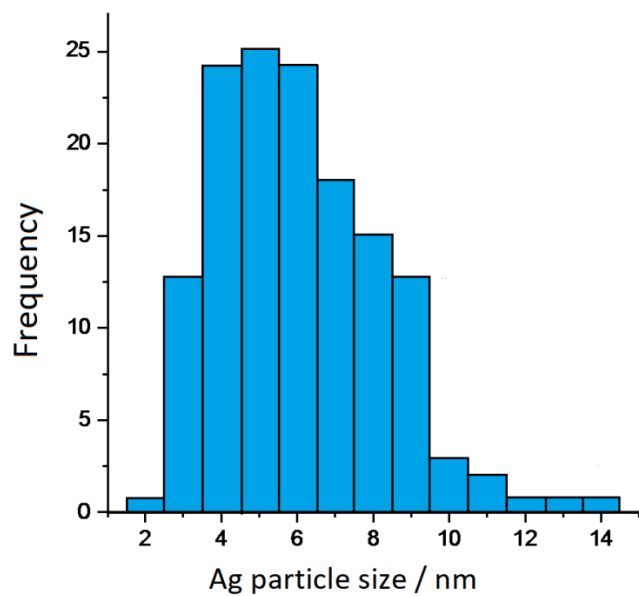

**Figure S3:** Size distribution of silver nanoparticles in the Ag-SiO<sub>2</sub> colloid.

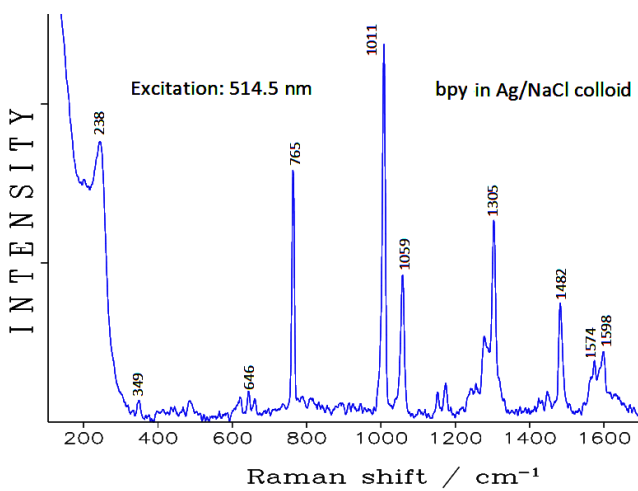

**Figure S4:** SERS of bpy in laser-ablated Ag colloid.

**Table S1:** Mulliken charges.<sup>a</sup>

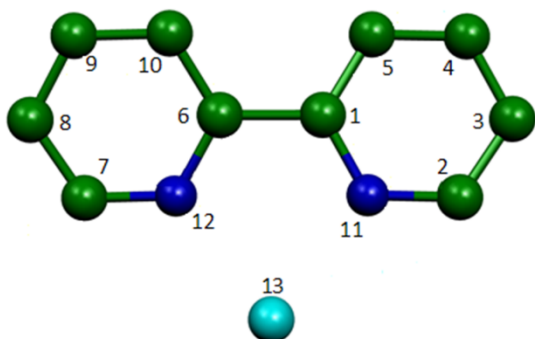

| Atom  | Ag <sup>+</sup> (bpy) | Ag <sup>0</sup> (bpy) |
|-------|-----------------------|-----------------------|
| 1 C   | 0.2101                | 0.1908                |
| 2 C   | 0.1620                | 0.1244                |
| 3 C   | 0.0728                | 0.0291                |
| 4 C   | 0.0833                | 0.0346                |
| 5 C   | 0.0276                | -0.0347               |
| 6 C   | 0.2101                | 0.1908                |
| 7 C   | 0.1620                | 0.1244                |
| 8 C   | 0.0728                | 0.0291                |
| 9 C   | 0.0833                | 0.0346                |
| 10 C  | 0.0276                | -0.0346               |
| 11 N  | -0.2938               | -0.2609               |
| 12 N  | -0.2938               | -0.2609               |
| 13 Ag | 0.4758                | -0.1664               |

<sup>a</sup>with hydrogens summed into heavy atoms.

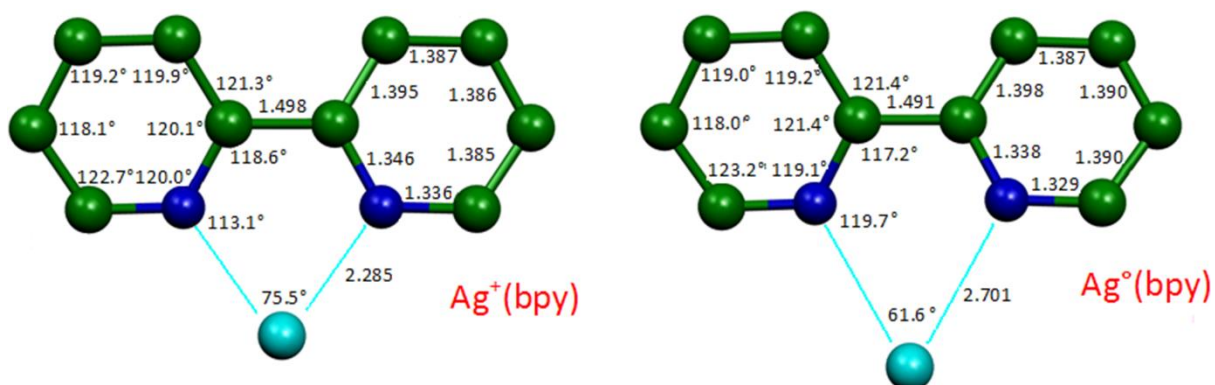

**Figure S5:** Structural parameters of the silver complexes.
